# Supplementary material
Source: Royal Society of Chemistry journal article supplement (doi:10.1039/d6tc00099a)
Supplement: d6tc00099a1.pdf [file d6tc00099a1.pdf]

## Supplemental material for **Nitrogen p-type doping in polycrystalline zinc selenide telluride films**

Christopher P. Muzzillo,<sup>1\*</sup> Craig L. Perkins,<sup>1</sup> Sachit Grover,<sup>2</sup> and Andriy Zakutayev<sup>1</sup>

<sup>1</sup>National Laboratory of the Rockies, Golden, CO 80401

<sup>2</sup>California Technology Center, First Solar Inc., Santa Clara, CA 95050

\*Corresponding author email: christopher.muzzillo@nrel.gov

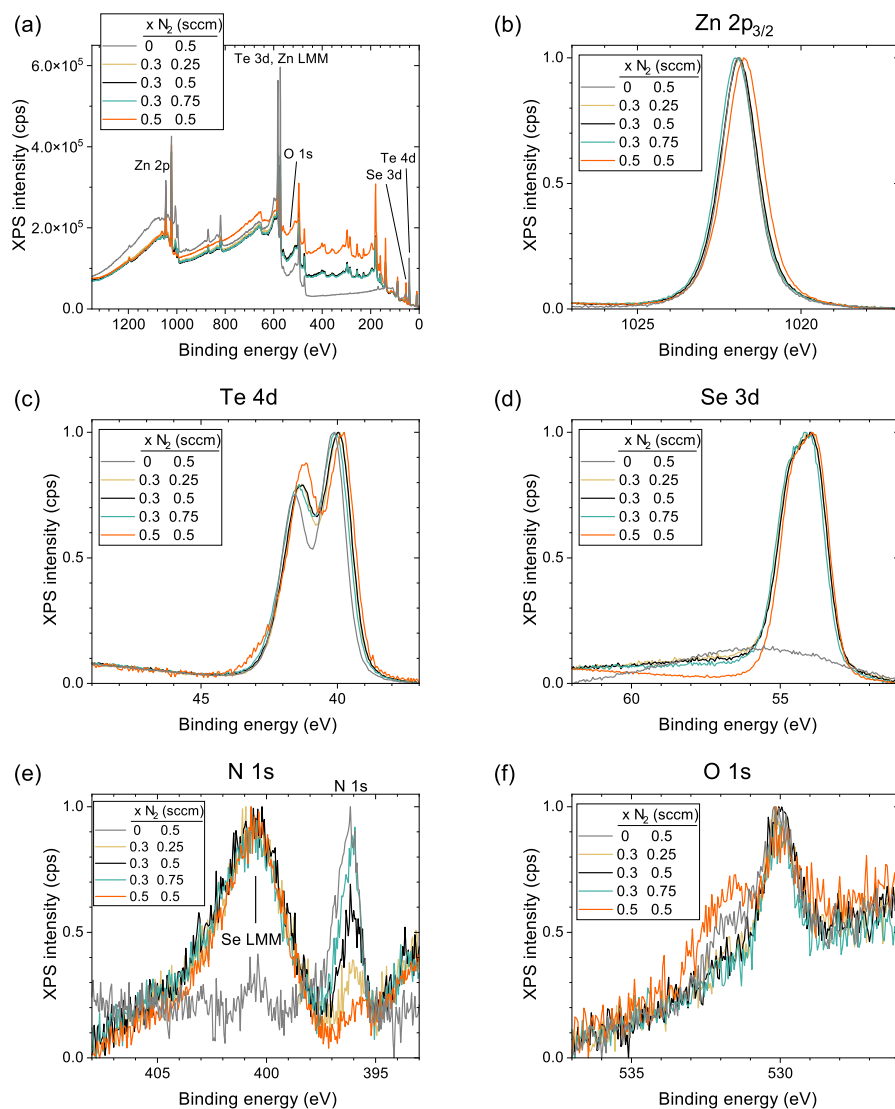

Fig. S1. (a) XPS survey scans, (b) Zn 2p<sub>3/2</sub>, (c) Te 4d, (d) Se 3d, (e) N 1s, and (f) O 1s high resolution core levels of the sputter-cleaned surfaces of ZnSe<sub>x</sub>Te<sub>1-x</sub> grown at 370 °C with x of 0, 0.3, and 0.5, and N<sub>2</sub> flow rates of 0.25, 0.5, and 0.75 for x of 0.3.

Table S1. XPS compositions for a growth temperature of 370 °C.

|                            |     |      |      |      |      |
|----------------------------|-----|------|------|------|------|
| XRF $x$ or 0<br>Se/(Se+Te) |     | 0.35 | 0.36 | 0.38 | 0.51 |
| N <sub>2</sub> (sccm)      | 0.5 | 0.25 | 0.5  | 0.75 | 0.5  |
| XPS N (%)                  | 2.5 | 0.63 | 1.3  | 2.5  | 0.43 |
| XPS $x$ or 0<br>Se/(Se+Te) |     | 0.47 | 0.49 | 0.53 | 0.85 |

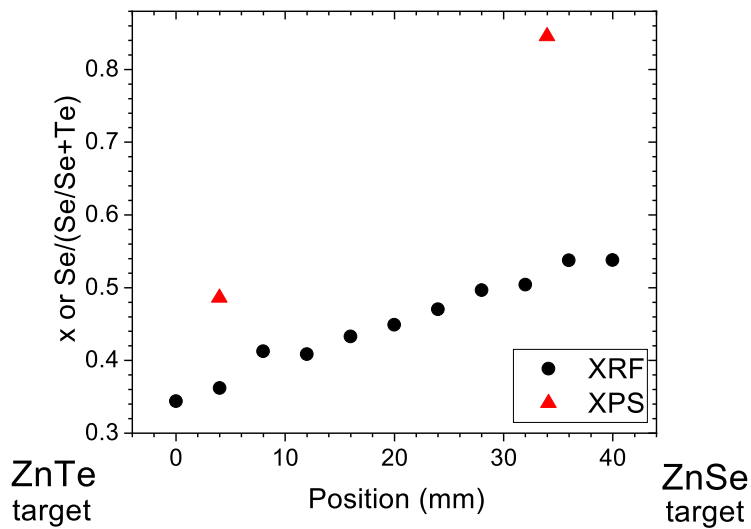

Fig. S2. XRF (black circles) and XPS (red triangles)  $x$  or Se/(Se+Te) composition as a function of position on a substrate for a growth temperature of 370 °C and N<sub>2</sub> flow of 0.5 sccm, where the ZnTe target and ZnSe target labels show target locations.

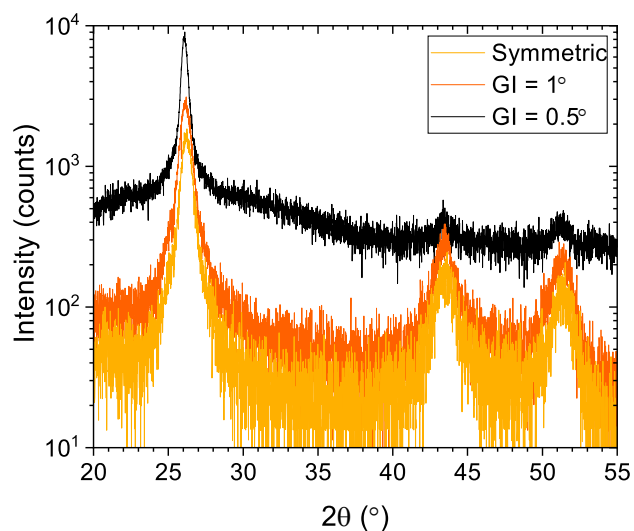

Fig. S3. Symmetric (black) XRD and GIXRD with an incidence angle of  $1^\circ$  (orange) and  $0.5^\circ$  (yellow) for a sample with  $x$  of 0.36,  $N_2$  flow of 0.25 sccm, and growth temperature of  $370^\circ\text{C}$ , showing no peak shift or apparent composition change from the bulk of the film to the surface.

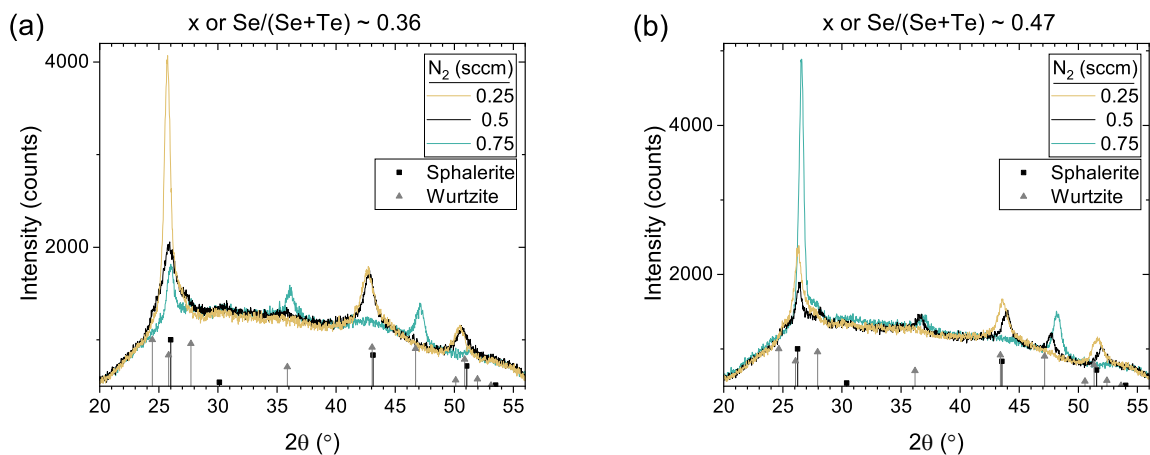

Fig. S4. XRD of films with  $x$  of 0.36 (a) and 0.47 (b) and  $N_2$  of 0.25 (yellow), 0.5 (black), and 0.75 (green) sccm for a growth temperature of  $370^\circ\text{C}$ , along with calculated sphalerite (black squares) and wurtzite (gray triangles) peaks, showing that the  $N_2$  stabilizes wurtzite relative to sphalerite at moderate  $x$ .

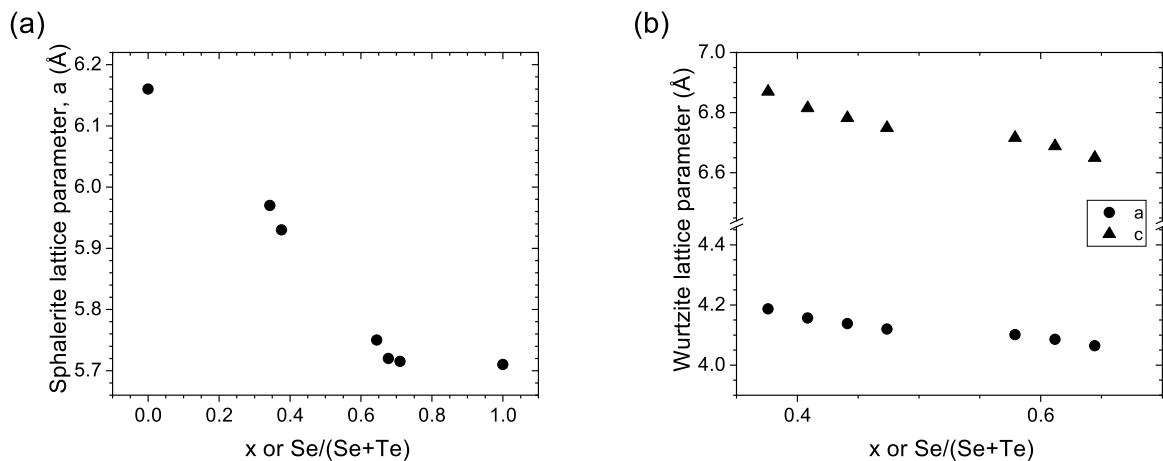

Fig. S5. (a) Sphalerite lattice parameters fit to samples with  $\text{N}_2$  flow of 0.5 sccm grown at 370 °C without significant wurtzite, showing sphalerite is stable at low and high  $x$ , and the lattice parameter stops shifting around  $x$  of 0.67. (b) Wurtzite  $a$  (circles) and  $c$  (triangles) lattice parameters for samples with  $\text{N}_2$  flow of 0.5 sccm grown at 370 °C.

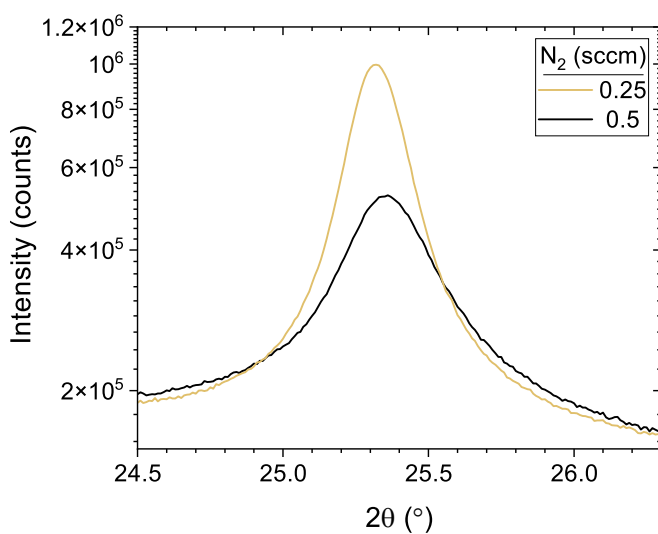

Fig. S6. Magnified (111) XRD peak for  $x$  of 0 and  $\text{N}_2$  flow of 0.25 (yellow) and 0.5 (black) at a growth temperature of 370 °C, showing a shift to larger full width at half maximum and smaller lattice spacing with  $\text{N}_2$  flow.

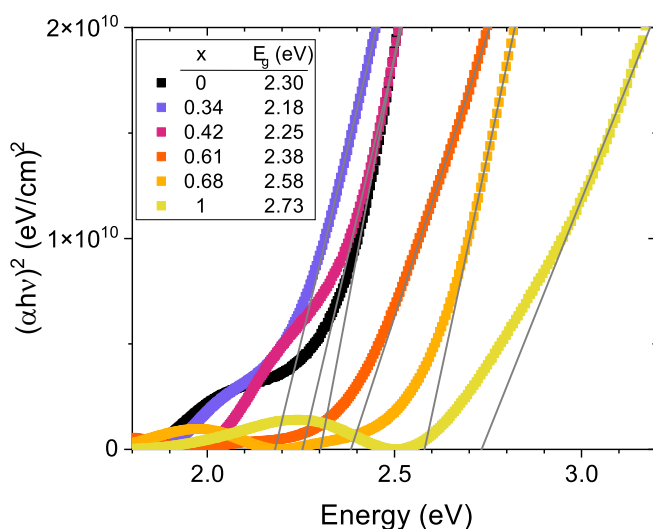

Fig. S7. UV-visible spectroscopy Tauc plot for films with x of 0 (black; 2.30 eV), 0.34 (purple; 2.18 eV), 0.42 (magenta; 2.25 eV), 0.61 (red orange; 2.38 eV), 0.68 (orange; 2.58 eV), and 1 (yellow; 2.73 eV) and  $N_2$  of 0.5 sccm grown at 370 °C, with linear fits extrapolated to band gaps ( $E_g$ ), showing more band gap bowing than the log10 absorption coefficient plot. Once the y-data reach 0, they increase again at lower energy (depending on film thickness), which is an artefact from film smoothness-caused interference fringes.

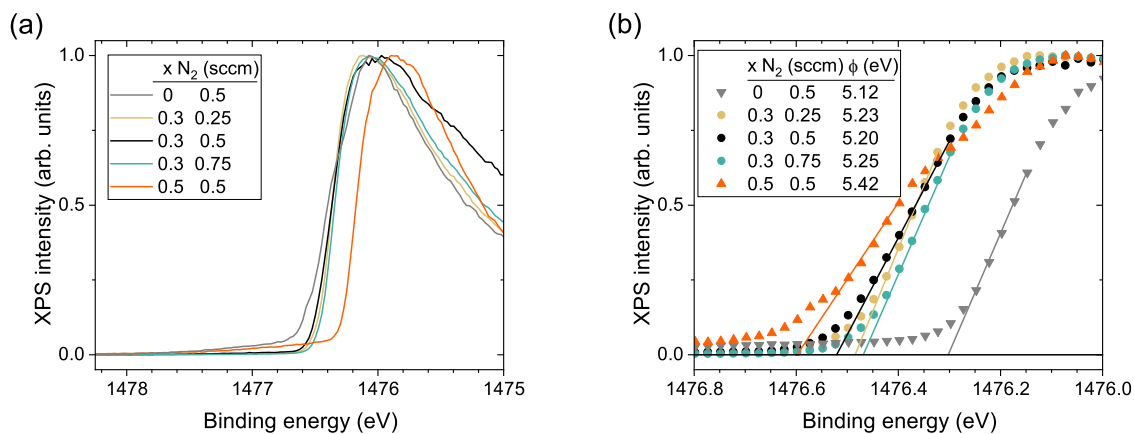

Fig. S8. Low power x-ray excited secondary electron cut-off spectra for x and  $N_2$  flow of 0 and 0.5 (gray triangles), 0.3 and 0.25 (yellow circles), 0.3 and 0.5 (black circles), 0.3 and 0.75 (green circles), and 0.5 and 0.5 (orange triangles) grown at 370 °C, respectively, where the fit x = 0 intercepts are  $\phi$  after calibrating to clean Au foil.

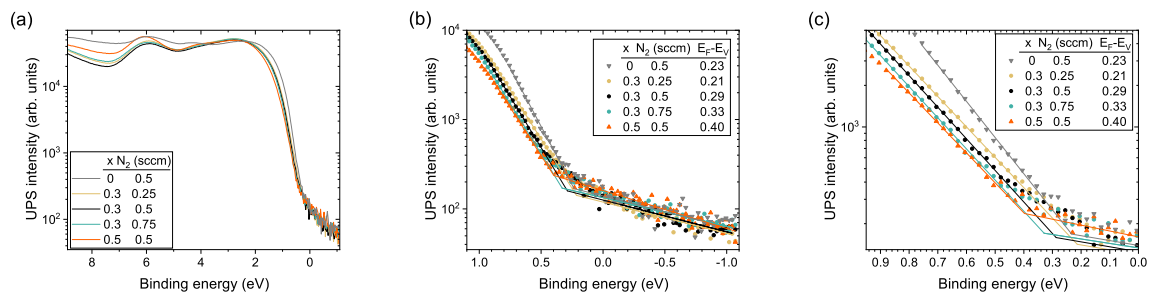

Fig. S9. Log UPS data for x and N<sub>2</sub> flow of 0 and 0.5 (gray triangles), 0.3 and 0.25 (yellow circles), 0.3 and 0.5 (black circles), 0.3 and 0.75 (green circles), and 0.5 and 0.5 (orange triangles) grown at 370 °C, respectively, where the fit intercepts are E<sub>F</sub>-E<sub>V</sub>.
